# Supplementary material for: The highs and lows of monoamine oxidase as molecular target in cancer: an updated review
Source: Springer Nature journal article supplement (doi:10.1007/s11010-024-05192-w), 2024-12-23
Supplement: MOESM1 [file 11010_2024_5192_MOESM1_ESM.pdf]

## Confirmation of Publication and Licensing Rights - Open Access

December 5th, 2024

**Subscription Type:** *Individual - Academic*  
**Agreement number:** *OT27MRAVT7*  
**Publisher Name:** *Molecular and Cellular Biochemistry*

**Figure Title:** *MAO upregulation in different cancer types*

**Citation to Use:** *Created in BioRender. Danila, M. (2024) <https://BioRender.com/p84a656>*

To whom this may concern,

This document ("Confirmation") hereby confirms that Science Suite Inc. dba BioRender ("BioRender") has granted the following BioRender user: Maria Danila ("User") a BioRender Academic Publication License in accordance with BioRender's [Terms of Service](#) and [Academic License Terms](#) ("License Terms") to permit such User to do the following on the condition that all requirements in this Confirmation are met:

- 1) publish their Completed Graphics created in the BioRender Services containing both User Content and BioRender Content (as both are defined in the License Terms) in publications (journals, textbooks, websites, etc.); and
- 2) sublicense such Completed Graphics under "open access" publication sublicensing models such as CC-BY 4.0 and more restrictive models, so long as the conditions set forth herein are fully met.

Requirements of User:

- 1) All Completed Graphics to be published in any publication (journals, textbooks, websites, etc.) must be accompanied by the following citation either as a caption, footnote or reference for each figure that includes a Completed Graphic:  
"Created in BioRender. Danila, M. (2024) <https://BioRender.com/p84a656>".
- 2) All terms of the License Terms including all Prohibited Uses are fully complied with. E.g. For Academic License Users, no commercial uses (beyond publication in journals, textbooks or websites) are permitted without obtaining or switching to a BioRender Industry Plan.
- 3) A Reader (defined below) may request that the User allow their figure to be a public template for Readers to view, copy, and modify the figure. It is up to the User to determine what level of access to grant.

Open-Access Journal Readers:

Open-Access journal readers ("Reader") who wish to view and/or re-use a particular Completed Graphic in an Open-Access journal subject to CC-BY sublicensing may do so by clicking on the URL link in the applicable citation for the subject Completed Graphic.
